# Supplementary material
Source: PubMed Central journal article supplement (PMC3121853)
Supplement: 1107478108_pnas.201107478SI.pdf [file 1107478108_pnas.201107478SI.pdf]

# Supporting Information

Nguyen et al. 10.1073/pnas.1107478108

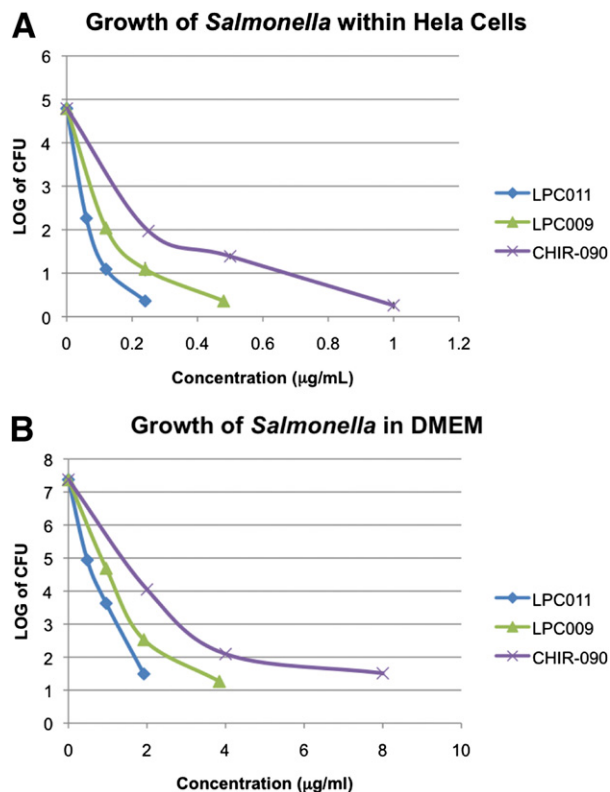

**Fig. S1.** LpxC inhibitors restrict the growth of intracellular bacteria. (A) HeLa cells were infected with *S. Typhimurium* SMO22 and incubated in media containing increasing concentrations of LpxC inhibitors and 25 μg/mL of gentamicin to inhibit growth of extracellular bacteria. Bacteria were harvested from infected cells, and the number of CFUs present determined on agar plates. To directly compare the sensitivity of extracellular *S. Typhimurium*, bacteria were incubated in DMEM at 37 °C and 5% CO<sub>2</sub> with or without LpxC inhibitors (B). The number of surviving CFUs was determined on LB agar plates at appropriate dilutions. All experiments were performed in triplicate. Methods: SMO22 was grown in LB broth without agitation at 37 °C to an OD<sub>600</sub> of 0.5. Bacteria were washed in PBS and diluted in DMEM/10% FBS. Confluent monolayers of HeLa cells were infected with SMO22 at a multiplicity of infection (MOI) of ~20 followed by incubation at 37 °C for 10 min. After extensive washes with PBS, gentamicin (100 μg/mL) was added for 2 h to kill extracellular bacteria. Media supplemented with 25 μg/mL gentamicin and the indicated LpxC inhibitors was then added, and the infected cells were incubated for 24 h in a 37 °C/5% CO<sub>2</sub>-humidified incubator. Intracellular bacteria were lysed with 1% Triton X-100/PBS, and the number of CFUs was determined on LB-agar plates. In parallel, the minimal inhibitory concentrations (MIC) for SMO22 were determined by treatment with LpxC inhibitors diluted in DMEM/10% FBS for 24 h at 37 °C and 5% CO<sub>2</sub>. All assays were completed in triplicate.

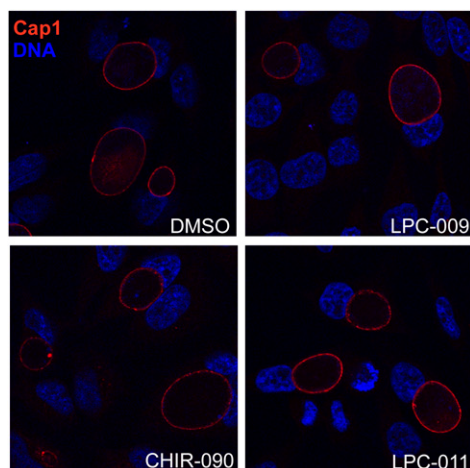

**Fig. S2.** LpxC inhibitors do not disrupt inclusion membrane integrity. HeLa cells were infected with *C. trachomatis* at MOI of 1 in media containing DMSO only, 10  $\mu\text{g/mL}$  of ampicillin, 16  $\mu\text{g/mL}$  of CHIR-090, 1.92  $\mu\text{g/mL}$  of LPC-009, or 1.92  $\mu\text{g/mL}$  of LPC-011. At 36 hpi, cells were fixed, permeabilized in 0.1% Triton X-100, and immunolabeled with anti-Cap1 (Alexa 555) and anti-MOMP (Alexa 488) antibodies.

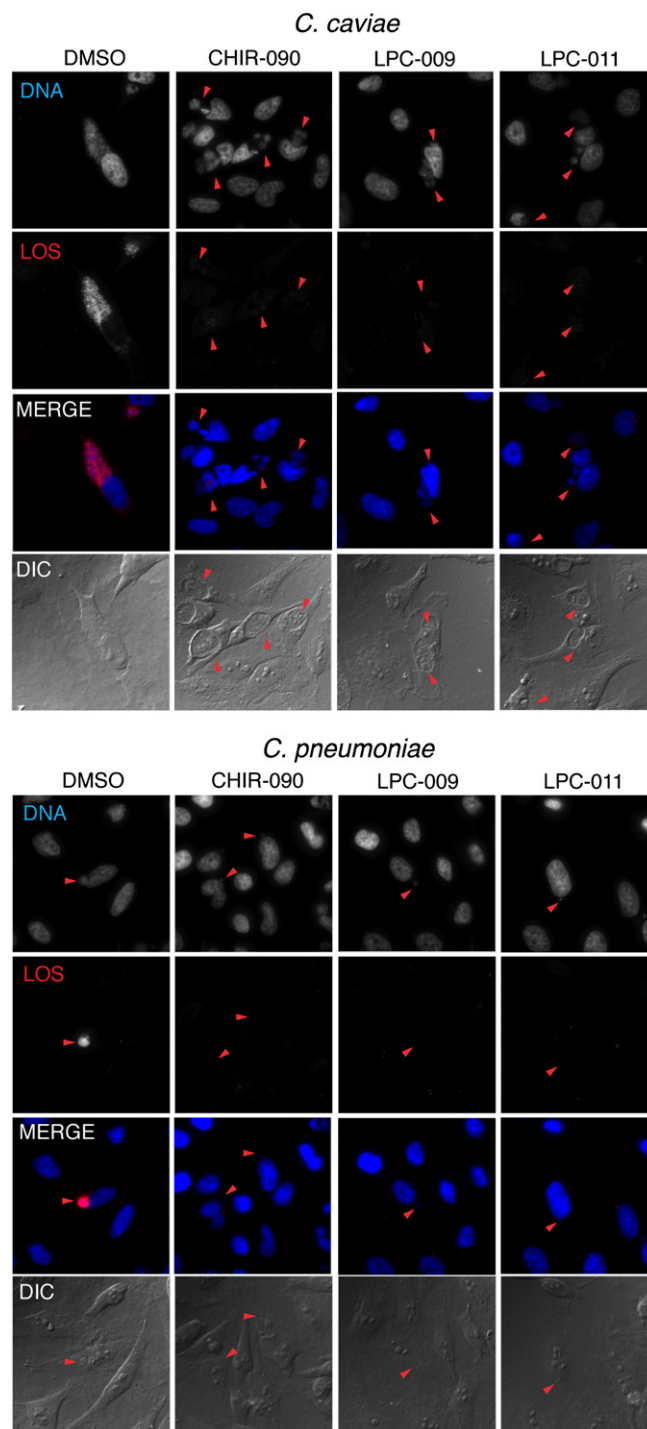

**Fig. S3.** LpxC inhibitors block LOS synthesis in other members of the *Chlamydiales*. HeLa cells were infected with *C. caviae* and *C. pneumoniae* in the presence of LpxC inhibitors and fixed at 48 hpi and 60 hpi, respectively. Following fixation, cells were permeabilized with 0.1% Triton X-100 and immunolabeled with anti-LOS antibodies (Alexa 555). Inclusions were detected by Hoechst staining of bacterial DNA.

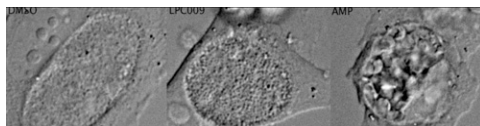

**Movie S1.** *C. trachomatis* displays robust replication and inclusion expansion in the presence of LpxC inhibitors. HeLa cells infected with *C. trachomatis* for 32 h were imaged over a 20-h period in the presence of LpxC inhibitors (16.0  $\mu\text{g/mL}$  CHIR-090, 1.92  $\mu\text{g/mL}$  LPC-011, or 1.92  $\mu\text{g/mL}$  LPC-009), DMSO (untreated control), and ampicillin (2  $\mu\text{g/mL}$ ; added at 32 hpi). Note that ampicillin-treated chlamydiae form distinctive, large aberrant RBs that were absent in inhibitor-treated and untreated cells. Also note that the intracellular contents appear darker in inhibitor-treated cells, causing RBs to appear more distinctive, compared with those of the DMSO controls. The differences are due to the lack of EBs in treated cells. Methods: HeLa cells were seeded on glass-bottom six-well plates (In Vitro Scientific) and infected with *C. trachomatis* LGV-L2 without centrifugation at MOI of 5 in the presence of indicated concentrations of inhibitors. Before imaging, the media was removed and replaced with fresh Hepes [4-(2-hydroxyethyl)-1-piperazineethanesulfonic acid] (Gibco) buffered media with or without inhibitor. Infected cells were placed on an atmospherically controlled stage (37  $^{\circ}\text{C}$ , 5%  $\text{CO}_2$ ) and imaged live at 4-min intervals for 20 h on the Inverted Axio Observer microscope (Zeiss). Images were processed using Metamorph software (Molecular Devices).

Nguyen et al. [www.pnas.org/cgi/content/short/1107478108](http://www.pnas.org/cgi/content/short/1107478108)
